# Supplementary material for: An Immuno-Separated Assay for Ochratoxin Detection Coupled with a Nano-Affinity Cleaning-Up for LC-Confirmation
Source: MDPI journal article supplement (doi:10.3390/foods11081155), 2022-04-15
Supplement: s1 [file s1]

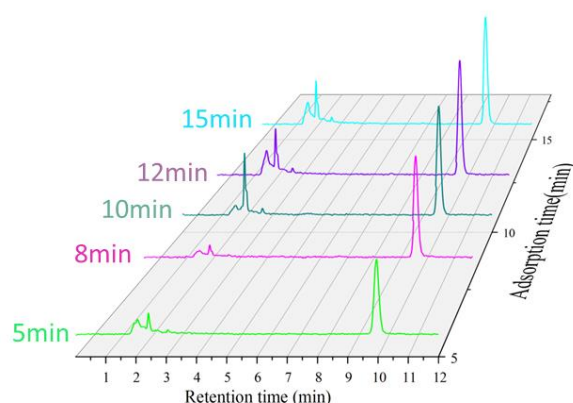

(a) Immuno-separated kinetics of OTA by IMAs

Twenty-ng OTA was diluted in 1.0 mL assay buffer for separation by IMAs with gradient adsorption time 5, 8, 10, 12, and 15 min. .

Each separated IMAs was eluted for LC detection, respectively.

It could be observed that the capture of OTA by IMAs reached balance after 10 mins.

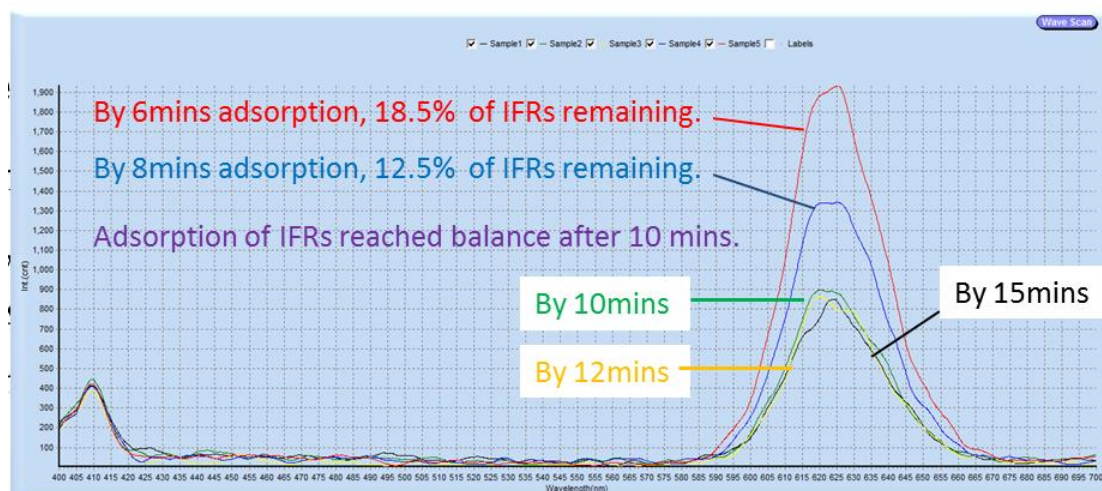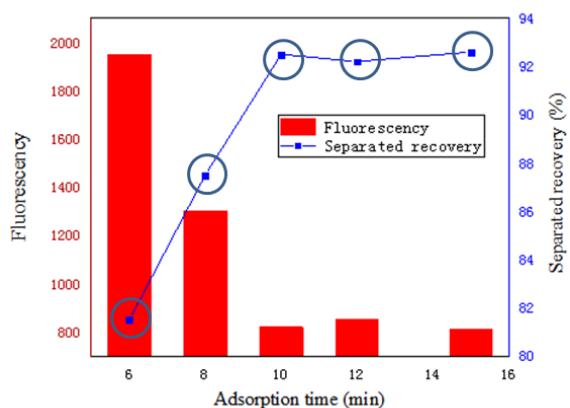

IFRs with level of 0.13 $\mu$ g was diluted in 500 $\mu$ L assay buffer for separation by IMAs with gradient adsorption time of 6, 8, 10, 12, and 15 min.

Each attempt IFRs/IMAs was separated in designed time, then supernatants for fluorescent detection. Results proved that the capture of IFRs by IMAs reached balance after 10 mins.

(b) Immuno-separated kinetics of IFRs by IMAs

**Figure S1.** Immuno-separated kinetics of OTA and IFRs by IMAs.
