# Supplementary material for: An Immuno-Separated Assay for Ochratoxin Detection Coupled with a Nano-Affinity Cleaning-Up for LC-Confirmation
Source: MDPI journal article supplement (doi:10.3390/foods11081155), 2022-04-15
Supplement: s1 [file s1]

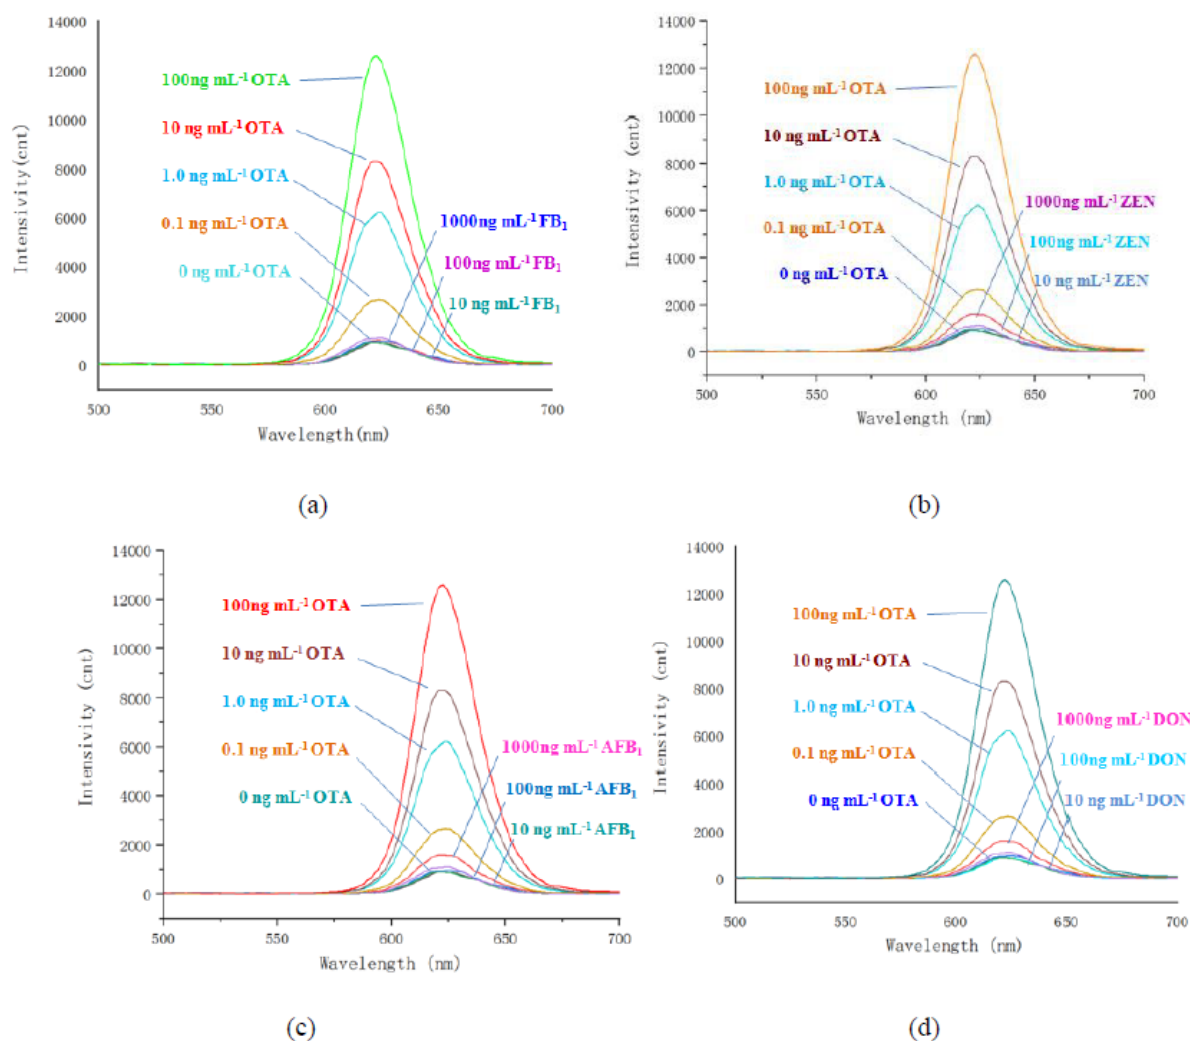

**Figure S2.** Cross-reactivity detection of Aflatoxin B<sub>1</sub>, Zearalenone, Fumonisin B<sub>1</sub> and Deoxynivalenol.

(a) Immuno-separated kinetics of OTA by IMAs. (b) Immuno-separated kinetics of IFRs by IMAs.

Figure-S2 Cross-reactivity detection of Aflatoxin B<sub>1</sub>, Zearalenone, Fumonisin B<sub>1</sub> and Deoxynivalenol.

(a) Cross-reactivity detection of Fumonisin B<sub>1</sub> (FB<sub>1</sub>). (b) Cross-reactivity detection of Zearalenone

(ZEN). (c) Cross-reactivity detection of Aflatoxin B<sub>1</sub> (AFB<sub>1</sub>). (d) Cross-reactivity detection of

Deoxynivalenol (DON).
